# Supplementary material for: Barriers and Facilitators in Perioperative Antibiotic Prophylaxis: A Mixed-Methods Study in a Small Island Setting
Source: MDPI journal article supplement (doi:10.3390/antibiotics10040462), 2021-04-19
Supplement: s1 [file s1]

# Supplementary files

Table S1 Results of the univariate and multivariate logistic regression for quality indicator 1 (indication)

| Variables                                | Univariate                      |                | Multivariate <sup>a</sup> |                |
|------------------------------------------|---------------------------------|----------------|---------------------------|----------------|
|                                          | OR (95% CI)                     | <i>p</i> value | OR (95% CI)               | <i>p</i> value |
| <b>Sex</b>                               |                                 |                |                           |                |
| Male                                     | <i>ref</i>                      |                |                           |                |
| Female                                   | 1.208 (0.477-3.061)             | 0.690          |                           |                |
|                                          | 0.886 (0.686-1.138)             | 0.329          |                           |                |
| <b>Body mass index</b>                   | 1.062 (0.985-1.145)             | 0.120          | 1.075 (0.972-1.189)       | 0.159          |
| <b>ASA classification</b>                |                                 | 0.976          |                           |                |
| 1                                        | <i>ref</i>                      |                |                           |                |
| 2                                        | 1.158 (0.320-4.195)             | 0.823          |                           |                |
| 3                                        | 0.917 (0.227-3.704)             | 0.903          |                           |                |
| 4                                        | 1.000 (0.050-19.963)            | 1.000          |                           |                |
| <b>AZV (health insurance)</b>            |                                 |                |                           |                |
| Yes                                      | <i>ref</i>                      |                |                           |                |
| No                                       | 1.026 (0.195-5.406)             | 0.976          |                           |                |
| <b>Renal function (GFR)<sup>c</sup></b>  | 0.605 (0.211-1.741)             | 0.352          |                           |                |
| <b>Knowledge renal function</b>          |                                 |                |                           |                |
| Yes                                      | 1.432 (0.594-3.449)             | 0.424          |                           |                |
| No                                       | <i>ref</i>                      |                |                           |                |
| <b>Preoperative antibiotic use</b>       |                                 |                |                           |                |
| Yes                                      | 1.727 (0.272-10.974)            | 0.562          |                           |                |
| No                                       | <i>ref</i>                      |                |                           |                |
| <b>Surgical ward</b>                     |                                 |                |                           |                |
| ENT                                      | 0.000 (0.000-.)                 | 0.054          |                           |                |
| Neurosurgery                             | 0.071 (0.006-0.881)             | 0.999          |                           |                |
| Orthopaedic surgery                      | 0.019 (0.001-0.357)             | 0.039          |                           |                |
| Gynaecologic surgery                     | 0.185 (0.019-1.848)             | 0.008          |                           |                |
| General surgery                          | 0.472 (0.047-4.770)             | 0.151          |                           |                |
| Urologic surgery                         | 0.667 (0.032-14.033)            | 0.525          |                           |                |
| Cardiologic surgery                      | 0.000 (0.000-.)                 | 0.794          |                           |                |
| Plastic surgery                          | <i>ref</i>                      | 0.999          |                           |                |
| <b>Type of surgery</b>                   |                                 | 0.997          |                           |                |
| Elective surgery                         | <i>ref</i>                      |                |                           |                |
| Emergency surgery                        | 1.056 (0.245-4.540)             | 0.942          |                           |                |
| Acute surgery                            | 1.705*10 <sup>9</sup> (0.000-.) | 1.000          |                           |                |
| <b>Duration of procedure<sup>d</sup></b> | 1.000 (1.000-1.000)             | 0.120          | 1.000 (1.000-1.010)       | 0.063          |
| <b>Blood loss<sup>e</sup></b>            | 1.647 (0.740-3.639)             | 0.243          |                           |                |
| <b>Use of implant</b>                    |                                 |                |                           |                |
| Yes                                      | 0.000 (0.000-.)                 | 0.999          |                           |                |
| No                                       | <i>ref</i>                      |                |                           |                |
| <b>Duration of preoperative stay</b>     | 1.031 (0.991-1.073)             | 0.134          | 1.022 (0.972-1.074)       | 0.402          |

Nr. number, CI confidence interval, OR odds ratio, *ref* reference

<sup>a</sup> Model consists of body mass index, duration of procedure and duration of preoperative stay.

<sup>b</sup> OR per 10 years increase in age (per 1-year increase in age: univariate OR 0.988; 95% CI: 0.963-1.013)

<sup>c</sup> OR per 10 ml/min increase in GFR (per 1 ml/min increase in GFR: univariate OR 0.951; 95% CI: 0.856-1.057)

<sup>d</sup> OR per 10 minutes increase in duration of the surgical procedure (per 1 minute increase in duration: univariate OR 1.000; 95%CI: 1.000-1.000/multivariate OR 1.000; 95%: 1.000-1.010)

<sup>e</sup>OR per 100 millilitre increase in blood loss (per 1 millilitre increase in blood loss: univariate OR 1.005; 95% CI: 0.997-1.013)

Table S2 Results of the univariate and multivariate logistic regression for quality indicator 2 (agent)

| Variables                                | Univariate           |                | Multivariate <sup>a</sup> |                |
|------------------------------------------|----------------------|----------------|---------------------------|----------------|
|                                          | OR (95% CI)          | <i>p</i> value | OR (95% CI)               | <i>p</i> value |
| <b>Sex</b>                               |                      |                |                           |                |
| Male                                     | <i>ref</i>           |                |                           |                |
| Female                                   | 1.560 (0.448-5.431)  | 0.485          |                           |                |
| <b>Age<sup>b</sup></b>                   | 0.505 (0.302-0.842)  | <u>0.009</u>   | 0.516 (0.305-0.869)       | <u>0.013</u>   |
| <b>Body mass index</b>                   | 1.018 (0.928-1.116)  | 0.705          |                           |                |
| <b>ASA classification</b>                |                      | 0.313          |                           |                |
| 1                                        | <i>ref</i>           |                |                           |                |
| 2                                        | 0.000 (0.000-.)      | 0.999          |                           |                |
| 3                                        | 0.000 (0.000-.)      | 0.999          |                           |                |
| 4                                        | 0.000 (0.000-.)      | 0.999          |                           |                |
| <b>AZV (health insurance)</b>            |                      |                |                           |                |
| Yes                                      | <i>ref</i>           |                |                           |                |
| No                                       | 0.394 (0.070-2.209)  | 0.290          |                           |                |
| <b>Renal function (GFR)<sup>c</sup></b>  | 0.860 (0.272-2.739)  | 0.801          |                           |                |
| <b>Knowledge renal function</b>          |                      |                |                           |                |
| Yes                                      | 0.286 (0.056-1.466)  | <u>0.133</u>   | 0.353 (0.059-2.123)       | 0.255          |
| No                                       | <i>ref</i>           |                |                           |                |
| <b>Preoperative antibiotic use</b>       |                      |                |                           |                |
| Yes                                      | 1.036 (0.086-12.414) | 0.978          |                           |                |
| No                                       | <i>ref</i>           |                |                           |                |
| <b>Surgical ward</b>                     |                      | 0.366          |                           |                |
| Neurosurgery                             | 1.000 (0.000-.)      | 1.000          |                           |                |
| Orthopaedic surgery                      | 0.000 (0.000-.)      | 0.999          |                           |                |
| Gynaecologic surgery                     | 1.000 (0.000-.)      | 1.000          |                           |                |
| General surgery                          | 0.000 (0.000-.)      | 0.999          |                           |                |
| Urologic surgery                         | 1.000 (0.000-.)      | 1.000          |                           |                |
| Cardiologic surgery                      | 0.000 (0.000-.)      | 0.999          |                           |                |
| Plastic surgery                          | <i>ref</i>           |                |                           |                |
| <b>Type of surgery</b>                   |                      | 0.592          |                           |                |
| Elective surgery                         | <i>ref</i>           |                |                           |                |
| Emergency surgery                        | 0.406 (0.072-2.281)  | 0.306          |                           |                |
| Acute surgery                            | 656286655 (0.000-.)  | 1.000          |                           |                |
| <b>Duration of procedure<sup>d</sup></b> | 1.000 (1.000-1.000)  | 0.908          |                           |                |
| <b>Blood loss<sup>e</sup></b>            | 1.020 (0.942-1.105)  | 0.618          |                           |                |
| <b>Use of implant</b>                    |                      |                |                           |                |
| Yes                                      | 0.000 (0.000-.)      | 0.998          |                           |                |
| No                                       | <i>ref</i>           |                |                           |                |
| <b>Duration of preoperative stay</b>     | 1.007 (0.971-1.044)  | 0.711          |                           |                |

Nr. number, CI confidence interval, OR odds ratio, *ref* reference

<sup>a</sup> Model consists of age and knowledge of renal function.

<sup>b</sup> OR per 10 years increase in age (per 1 year increase in age: univariate OR 0.934; 95% CI: 0.887-0.983/multivariate OR 0.936; 95%: 0.888-0.986)

<sup>c</sup> OR per 10 ml/min increase in GFR (per 1 ml/min increase in GFR: univariate OR 0.985; 95% CI: 0.878-1.106)

<sup>d</sup> OR per 10 minutes increase in duration of the surgical procedure (per 1 minute increase in duration: univariate OR 1.000; 95%CI: 1.000-1.000)

<sup>e</sup> OR per 100 millilitre increase in blood loss (per 1 millilitre increase in blood loss: univariate OR 1.002; 95% CI: 0.994-1.010)

Table S3 Results of the univariate and multivariate logistic regression for quality indicator 4 (timing)

| Variables                                | Univariate                      |                | Multivariate <sup>a</sup> |                |
|------------------------------------------|---------------------------------|----------------|---------------------------|----------------|
|                                          | OR (95% CI)                     | <i>p</i> value | OR (95% CI)               | <i>p</i> value |
| <b>Sex</b>                               |                                 |                |                           |                |
| Male                                     | <i>ref</i>                      |                |                           |                |
| Female                                   | 0.514 (0.131-2.020)             | 0.341          |                           |                |
| <b>Age<sup>b</sup></b>                   | 1.842 (1.127-2.997)             | <u>0.014</u>   | 1.791 (1.094-2.917)       | 0.020          |
| <b>Body mass index</b>                   | 0.959 (0.865-1.063)             | 0.428          |                           |                |
| <b>ASA classification</b>                |                                 | 0.495          |                           |                |
| 1                                        | <i>ref</i>                      |                |                           |                |
| 2                                        | 0.242 (0.029-2.027)             | <u>0.191</u>   |                           |                |
| 3                                        | 0.667 (0.084-5.301)             | 0.702          |                           |                |
| 4                                        | 1.077*10 <sup>9</sup> (0.000-.) | 1.000          |                           |                |
| <b>AZV (health insurance)</b>            |                                 |                |                           |                |
| Yes                                      | <i>ref</i>                      |                |                           |                |
| No                                       | 4.615 (0.432-49.296)            | 0.206          | 2.906 (0.256-32.952)      | 0.389          |
| <b>Renal function (GFR)<sup>c</sup></b>  | 0.923 (0.027-31.503)            | 0.964          |                           |                |
| <b>Knowledge renal function</b>          |                                 |                |                           |                |
| Yes                                      | 1.733 (0.360-8.351)             | 0.493          |                           |                |
| No                                       | <i>ref</i>                      |                |                           |                |
| <b>Preoperative antibiotic use</b>       |                                 |                |                           |                |
| Yes                                      | 0.000 (0.000-.)                 | 1.000          |                           |                |
| No                                       | <i>ref</i>                      |                |                           |                |
| <b>Surgical ward</b>                     |                                 |                |                           |                |
| Neurosurgery                             |                                 |                |                           |                |
| Orthopaedic surgery                      |                                 |                |                           |                |
| Gynaecologic surgery                     |                                 |                |                           |                |
| General surgery                          |                                 |                |                           |                |
| Urologic surgery                         |                                 |                |                           |                |
| Cardiologic surgery                      |                                 |                |                           |                |
| Plastic surgery                          |                                 |                |                           |                |
| <b>Type of surgery</b>                   |                                 |                |                           |                |
| Elective surgery                         | <i>ref</i>                      |                |                           |                |
| Emergency surgery                        | 3.167 (0.500-20.036)            | <u>0.221</u>   |                           |                |
| <b>Duration of procedure<sup>d</sup></b> | 1.000 (1.000-1.000)             | 0.367          |                           |                |
| <b>Blood loss<sup>e</sup></b>            | 0.819 (0.448-1.491)             | 0.649          |                           |                |
| <b>Use of implant</b>                    |                                 |                |                           |                |
| Yes                                      | 1.385 (0.240-7.985)             | 0.716          |                           |                |
| No                                       | <i>ref</i>                      |                |                           |                |
| <b>Duration of preoperative stay</b>     | 0.995 (0.961-1.030)             | 0.770          |                           |                |

Nr. number, CI confidence interval, OR odds ratio, *ref* reference

<sup>a</sup> Model consists of age and AZV insurance.

<sup>b</sup> OR per 10 years increase in age (per 1-year increase in age: univariate OR 1.063; 95% CI: 1.012-1.116/multivariate OR 1.060; 95%: 1.009-1.113)

<sup>c</sup> OR per 10 ml/min increase in GFR (per 1 ml/min increase in GFR: univariate OR 0.992; 95% CI: 0.697-1.412)

<sup>d</sup> OR per 10 minutes increase in duration of the surgical procedure (per 1 minute increase in duration: univariate OR 1.000; 95%CI: 1.000-1.000)

<sup>e</sup> OR per 100 millilitres increase in blood loss (per 1 millilitre increase in blood loss: univariate OR 0.998; 95% CI: 0.992-1.004)

Table S4 Results of the univariate and multivariate logistic regression for quality indicator 5 (duration)

| Variables                                | Univariate                            |                | Multivariate <sup>a</sup> |                |
|------------------------------------------|---------------------------------------|----------------|---------------------------|----------------|
|                                          | OR (95% CI)                           | <i>p</i> value | OR (95% CI)               | <i>p</i> value |
| <b>Sex</b>                               |                                       |                |                           |                |
| Male                                     | <i>ref</i>                            |                |                           |                |
| Female                                   | 0.000 (0.000-.)                       | 0.998          |                           |                |
| <b>Age<sup>b</sup></b>                   | 0.599 (0.319-1.127)                   | <u>0.109</u>   | 0.745 (0.365-1.524)       | 0.420          |
| <b>Body mass index</b>                   | 1.067 (0.935-1.218)                   | 0.333          |                           |                |
| <b>ASA classification</b>                |                                       | 1.000          |                           |                |
| 1                                        | <i>ref</i>                            |                |                           |                |
| 2                                        | 1.150 (0.105-12.619)                  | 0.909          |                           |                |
| 3                                        | 3.231*10 <sup>8</sup> (0.000-.)       | 0.998          |                           |                |
| 4                                        | 3.231*10 <sup>8</sup> (0.000-.)       | 0.999          |                           |                |
| <b>AZV (health insurance)</b>            |                                       |                |                           |                |
| Yes                                      | <i>ref</i>                            |                |                           |                |
| No                                       | 0.543 (0.053-5.625)                   | 0.609          |                           |                |
| <b>Renal function (GFR)<sup>c</sup></b>  | 0.000 (0.000-.)                       | 0.994          |                           |                |
| <b>Knowledge renal function</b>          |                                       |                |                           |                |
| Yes                                      | 0.000 (0.000-.)                       | 0.998          |                           |                |
| No                                       | <i>ref</i>                            |                |                           |                |
| <b>Preoperative antibiotic use</b>       |                                       |                |                           |                |
| Yes                                      | 0.000 (0.000-.)                       | 0.999          |                           |                |
| No                                       | <i>ref</i>                            |                |                           |                |
| <b>Surgical ward</b>                     |                                       |                |                           |                |
| Neurosurgery                             |                                       |                |                           |                |
| Orthopaedic surgery                      |                                       |                |                           |                |
| Gynaecologic surgery                     |                                       |                |                           |                |
| General surgery                          |                                       |                |                           |                |
| Urologic surgery                         |                                       |                |                           |                |
| Cardiologic surgery                      |                                       |                |                           |                |
| Plastic surgery                          |                                       |                |                           |                |
| <b>Type of surgery</b>                   |                                       |                |                           |                |
| Elective surgery                         | <i>ref</i>                            |                |                           |                |
| Emergency surgery                        | 2.254*10 <sup>8</sup> (0.000-.)       | 0.999          |                           |                |
| Acute surgery                            | 2.254*10 <sup>8</sup> (0.000-.)       | 1.000          |                           |                |
| <b>Duration of procedure<sup>d</sup></b> | 0.834 (0.000-7.536*10 <sup>12</sup> ) | 0.990          |                           |                |
| <b>Blood loss<sup>e</sup></b>            | 0.905 (0.405-2.009)                   | 0.716          |                           |                |
| <b>Use of implant</b>                    |                                       |                |                           |                |
| Yes                                      | 0.080 (0.012-0.519)                   | <u>0.008</u>   | 0.111 (0.015-0.807)       | <u>0.030</u>   |
| No                                       | <i>ref</i>                            |                |                           |                |
| <b>Duration of preoperative stay</b>     | 1.009 (0.951-1.070)                   | 0.777          |                           |                |

Nr. number, CI confidence interval, OR odds ratio, *ref* reference

<sup>a</sup> Model consists of age and use of implant.

<sup>b</sup> OR per 10 years increase in age (per 1-year increase in age: univariate OR 0.950; 95% CI: 0.892-1.012/multivariate OR 0.971; 95%: 0.904-1.043)

<sup>c</sup>OR per 10 ml/min increase in GFR (per 1 ml/min increase in GFR: univariate OR 0.000; 95% CI: 0.000-.)

<sup>d</sup>OR per 10 minutes increase in duration of the surgical procedure (per 1 minute increase in duration: univariate OR 0.982; 95%CI: 0.050-19.396)

<sup>e</sup>OR per 100 millilitre increase in blood loss (per 1 millilitre increase in blood loss: univariate OR 0.999; 95% CI: 0.991-1.007)

Table S4 Results of the univariate and multivariate logistic regression for cumulative appropriateness

| Variables                                | Univariate                      | Multivariate <sup>a</sup> |                     |                |
|------------------------------------------|---------------------------------|---------------------------|---------------------|----------------|
|                                          | OR (95% CI)                     | <i>p</i> value            | OR (95% CI)         | <i>p</i> value |
| <b>Sex</b>                               |                                 |                           |                     |                |
| Male                                     | <i>ref</i>                      |                           |                     |                |
| Female                                   | 0.979 (0.370-2.594)             | 0.967                     |                     |                |
| <b>Age<sup>b</sup></b>                   | 1.172 (0.904-1.524)             | 0.222                     | 1.041 (0.776-1.384) | 0.810          |
| <b>Body mass index</b>                   | 1.048 (0.969-1.133)             | 0.241                     | 1.014 (0.928-1.107) | 0.758          |
| <b>ASA classification</b>                |                                 | 0.584                     |                     |                |
| 1                                        | <i>ref</i>                      |                           |                     |                |
| 2                                        | 1.929 (0.524-7.096)             | 0.323                     |                     |                |
| 3                                        | 2.833 (0.655-12.263)            | 0.164                     |                     |                |
| 4                                        | 1.615*10 <sup>9</sup> (0.000-.) | 0.999                     |                     |                |
| <b>AZV (health insurance)</b>            |                                 |                           |                     |                |
| Yes                                      | <i>ref</i>                      |                           |                     |                |
| No                                       | 2.857 (0.318-25.700)            | 0.349                     |                     |                |
| <b>Renal function (GFR)<sup>c</sup></b>  | 0.644 (0.155-2.690)             | 0.549                     |                     |                |
| <b>Knowledge renal function</b>          |                                 |                           |                     |                |
| Yes                                      | 3.083 (1.209-7.861)             | <u>0.018</u>              |                     |                |
| No                                       | <i>ref</i>                      |                           |                     |                |
| <b>Preoperative antibiotic use</b>       |                                 |                           |                     |                |
| Yes                                      | 2.455 (0.261-23.127)            | 0.433                     |                     |                |
| No                                       | <i>ref</i>                      |                           |                     |                |
| <b>Surgical ward</b>                     |                                 |                           |                     |                |
| ENT                                      | 0.000 (0.000-.)                 | 0.061                     |                     |                |
| Neurosurgery                             | 0.071 (0.006-0.881)             | 0.999                     |                     |                |
| Orthopaedic surgery                      | 0.389 (0.032-4.796)             | 0.039                     |                     |                |
| Gynaecologic surgery                     | 0.185 (0.019-1.848)             | 0.461                     |                     |                |
| General surgery                          | 1.750 (0.134-22.778)            | 0.151                     |                     |                |
| Urologic surgery                         | 0.667 (0.032-14.033)            | 0.669                     |                     |                |
| Cardiologic surgery                      | 0.167 (0.012-2.368)             | 0.794                     |                     |                |
| Plastic surgery                          | <i>ref</i>                      | 0.186                     |                     |                |
| <b>Type of surgery</b>                   |                                 | 0.417                     |                     |                |
| Elective surgery                         | <i>ref</i>                      |                           |                     |                |
| Emergency surgery                        | 4.261 (0.498-36.481)            | 0.186                     |                     |                |
| Acute surgery                            | 983332513 (0.000-.)             | 1.000                     |                     |                |
| <b>Duration of procedure<sup>d</sup></b> | 1.000 (1.000-1.010)             | <u>0.040</u>              |                     |                |
| <b>Blood loss<sup>e</sup></b>            | 25.706 (0.088-7278.069)         | 0.257                     |                     |                |
| <b>Use of implant</b>                    |                                 |                           |                     |                |
| Yes                                      | 1.507 (0.367-6.182)             | 0.569                     |                     |                |
| No                                       | <i>ref</i>                      |                           |                     |                |
| <b>Duration of preoperative stay</b>     | 2.739 (1.217-6.166)             | <u>0.015</u>              | 2.101 (0.942-4.685) | 0.070          |

Nr. number, CI confidence interval, OR odds ratio, *ref* reference

<sup>a</sup>Model consists of age, body mass index and duration of preoperative stay.

<sup>b</sup>OR per 10 years increase in age (per 1-year increase in age: univariate OR 1.016; 95% CI: 0.990-1.043)

<sup>c</sup>OR per 10 ml/min increase in GFR (per 1 ml/min increase in GFR: univariate OR 0.957; 95% CI: 0.830-1.104)

<sup>d</sup>OR per 10 minutes increase in duration of the surgical procedure (per 1 minute increase in duration: univariate OR 1.000; 95%CI: 1.000-1.001)

<sup>e</sup>OR per 100 millilitre increase in blood loss (per 1 millilitre increase in blood loss: univariate OR 1.033; 95% CI: 0.976-1.093)
